# Supplementary material
Source: Springer Nature journal article supplement (https://www.springermedizin.de/resource/supplementary/12885_2001_10_MOESM7_ESM.pdf/9460004)

# LoVo

# DLD-1

0 4 15 39

0 7 27 58 (PDL)

hTERT

hTR

TEP-1

G3PDH

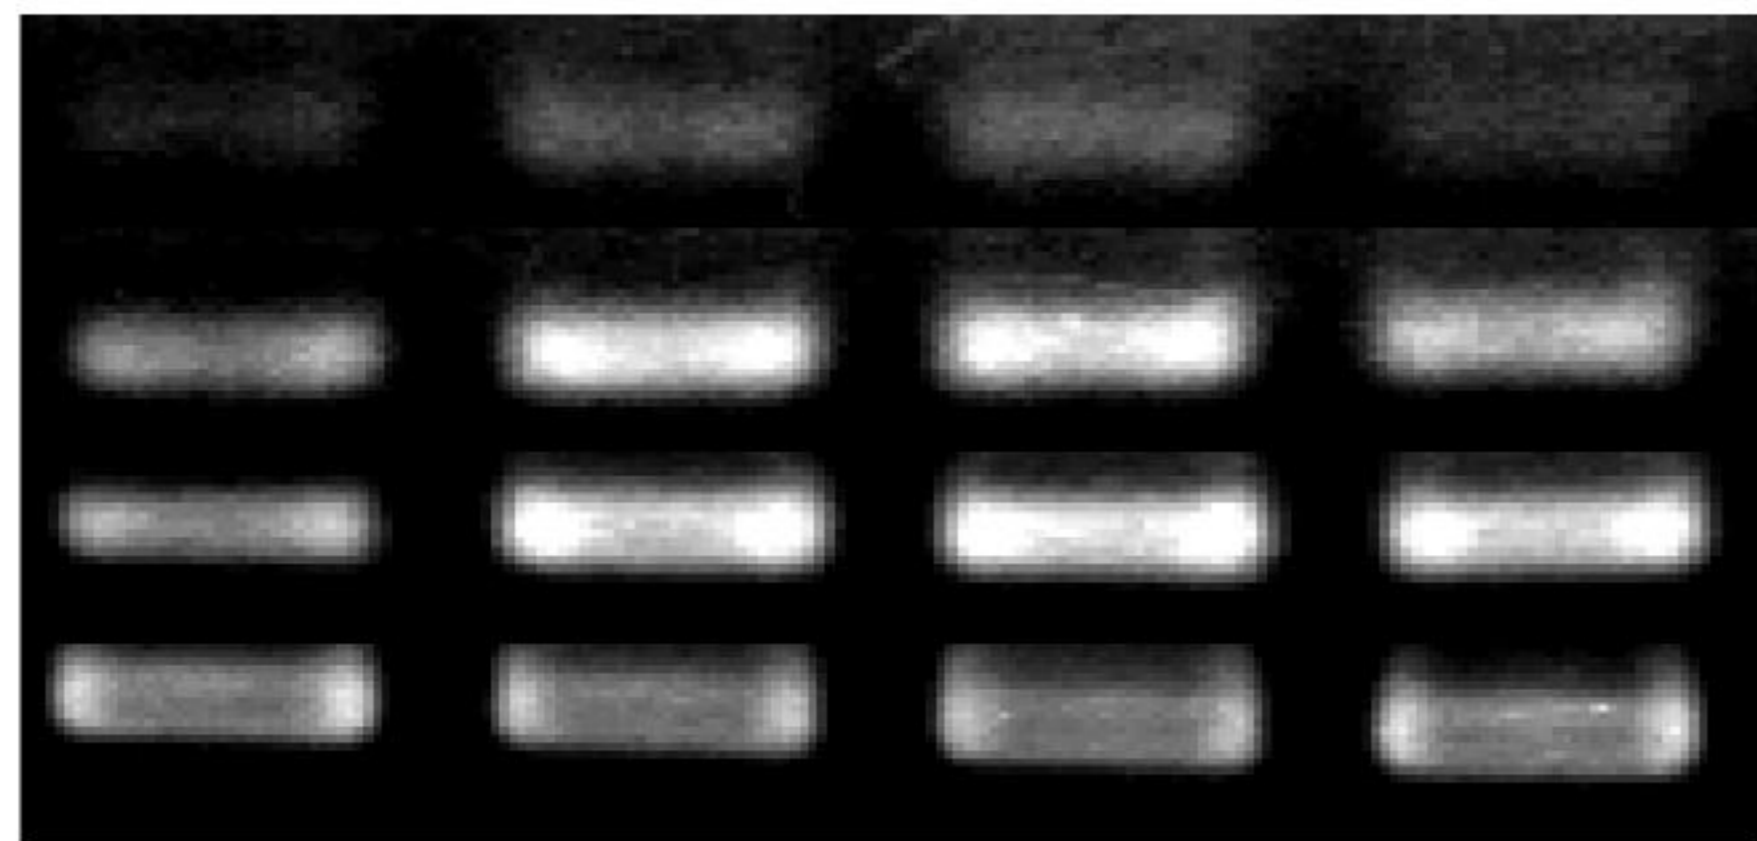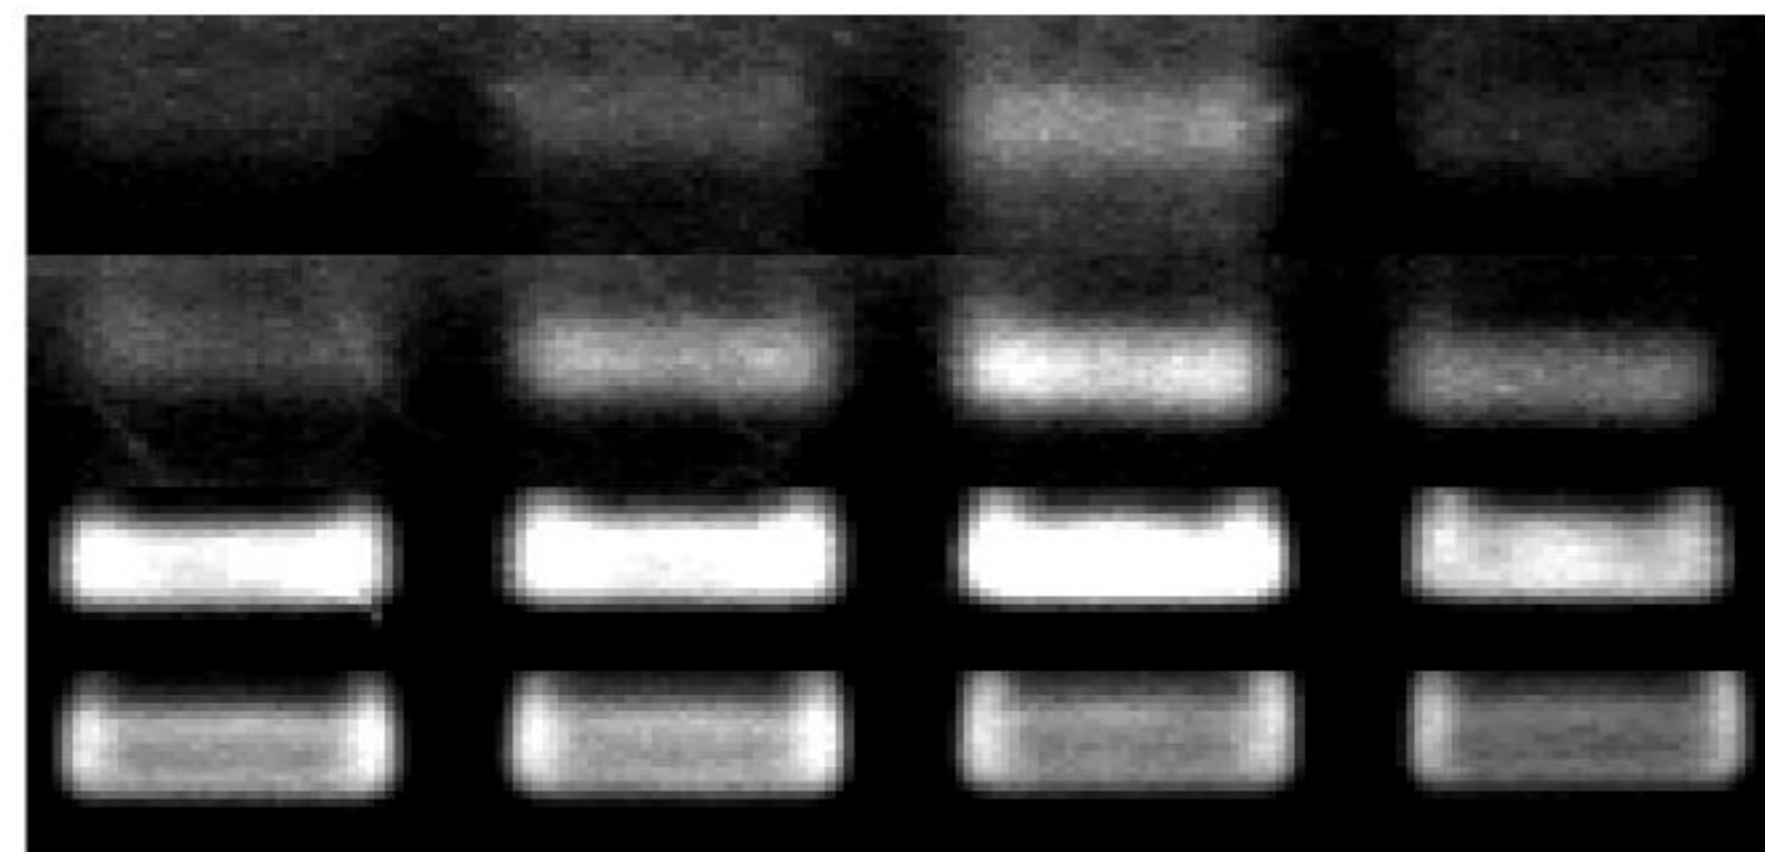

Supplement: MOESM7 [file 9460004]
